# Supplementary material for: Adenoid Cystic Carcinoma of the Breast May Be Exempt from Adjuvant Chemotherapy
Source: MDPI journal article supplement (doi:10.3390/jcm11154477), 2022-07-31
Supplement: s1 [file s1]

**Supplementary Table S1 Clinical characteristics of patients with ACCB in chemotherapy group and non- chemotherapy group in NCC**

| Characteristics | Total (n=26) | Chemotherapy |          | P     |
|-----------------|--------------|--------------|----------|-------|
|                 |              | Yes (n=7)    | No(n=19) |       |
| Age             |              |              |          | 1.000 |
| < 60            | 13(21.2)     | 4(30.5)      | 9(19.9)  |       |
| ≥60             | 13(78.8)     | 3(69.5)      | 10(80.1) |       |
| Sex             |              |              |          | 0.269 |
| Female          | 25(99.1)     | 6(100)       | 19(99)   |       |
| Male            | 1(0.9)       | 1(0)         | 0(1)     |       |
| Stage           |              |              |          | 1.000 |
| I               | 16(57.9)     | 4(35.4)      | 12(61.1) |       |
| IIA             | 10(35.7)     | 3(43.9)      | 7(34.5)  |       |
| Tumor size      |              |              |          | 1.000 |
| ≤2cm            | 16(59)       | 4(39)        | 12(61.8) |       |
| > 2cm           | 10(37.4)     | 3(54.9)      | 7(34.9)  |       |
| Lymph node      |              |              |          | 1.000 |
| N0              | 26(95.9)     | 7(79.3)      | 19(98.3) |       |
| ER status       |              |              |          | 0.546 |
| Positive        | 4(20.7)      | 0(22)        | 4(20.6)  |       |
| Negative        | 22(79.3)     | 7(78)        | 15(79.4) |       |
| PR status       |              |              |          | -     |
| Negative        | 26(87.1)     | 7(79.3)      | 19(88.3) |       |
| Grade           |              |              |          | -     |
| 1               | 6(32.2)      | 1(20.7)      | 5(33.9)  |       |
| ≥2              | 4(28)        | 3(32.9)      | 1(27.3)  |       |
| unknow          | 16(28)       | 3(22)        | 13(28.8) |       |
| Radiotherapy    |              |              |          | 0.375 |
| Yes             | 8(47.5)      | 1(54.9)      | 7(46.5)  |       |
| No              | 18(52.5)     | 6(45.1)      | 12(53.5) |       |

|      |          |         |          |       |
|------|----------|---------|----------|-------|
| Age  |          |         |          | 1.000 |
| < 60 | 13(21.2) | 4(30.5) | 9(19.9)  |       |
| ≥60  | 13(78.8) | 3(69.5) | 10(80.1) |       |
