# Supplementary figures and images for: Adenoid Cystic Carcinoma of the Breast May Be Exempt from Adjuvant Chemotherapy
Source: MDPI journal article supplement (doi:10.3390/jcm11154477), 2022-07-31

**Raw Treated**

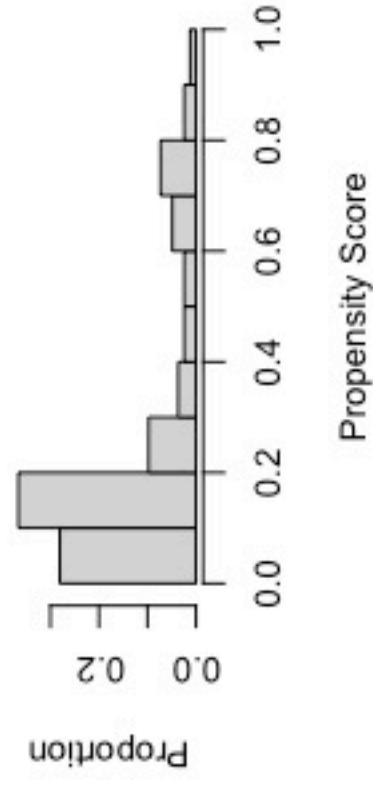

**Matched Treated**

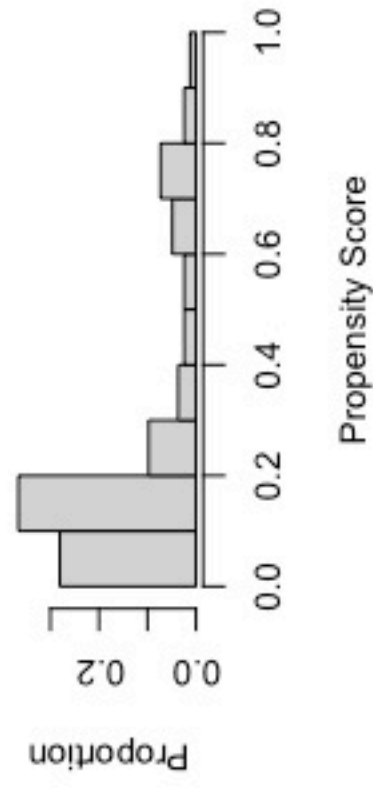

**Raw Control**

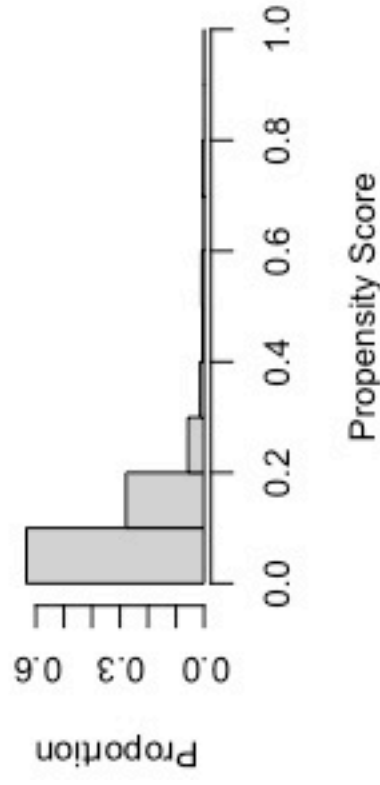

**Matched Control**

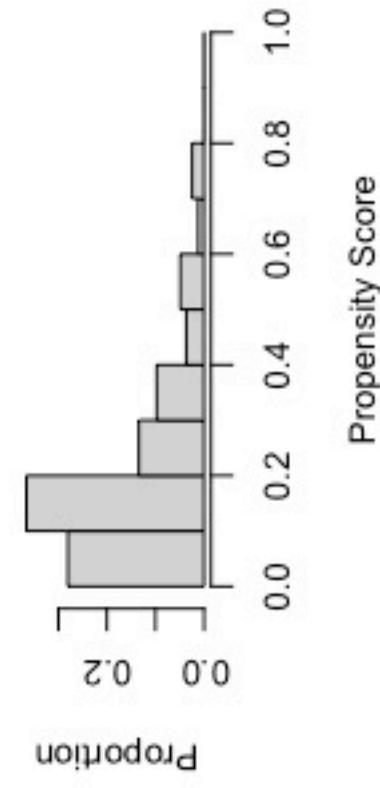

Supplement: s1 [file s1]

## Distribution of Propensity Scores

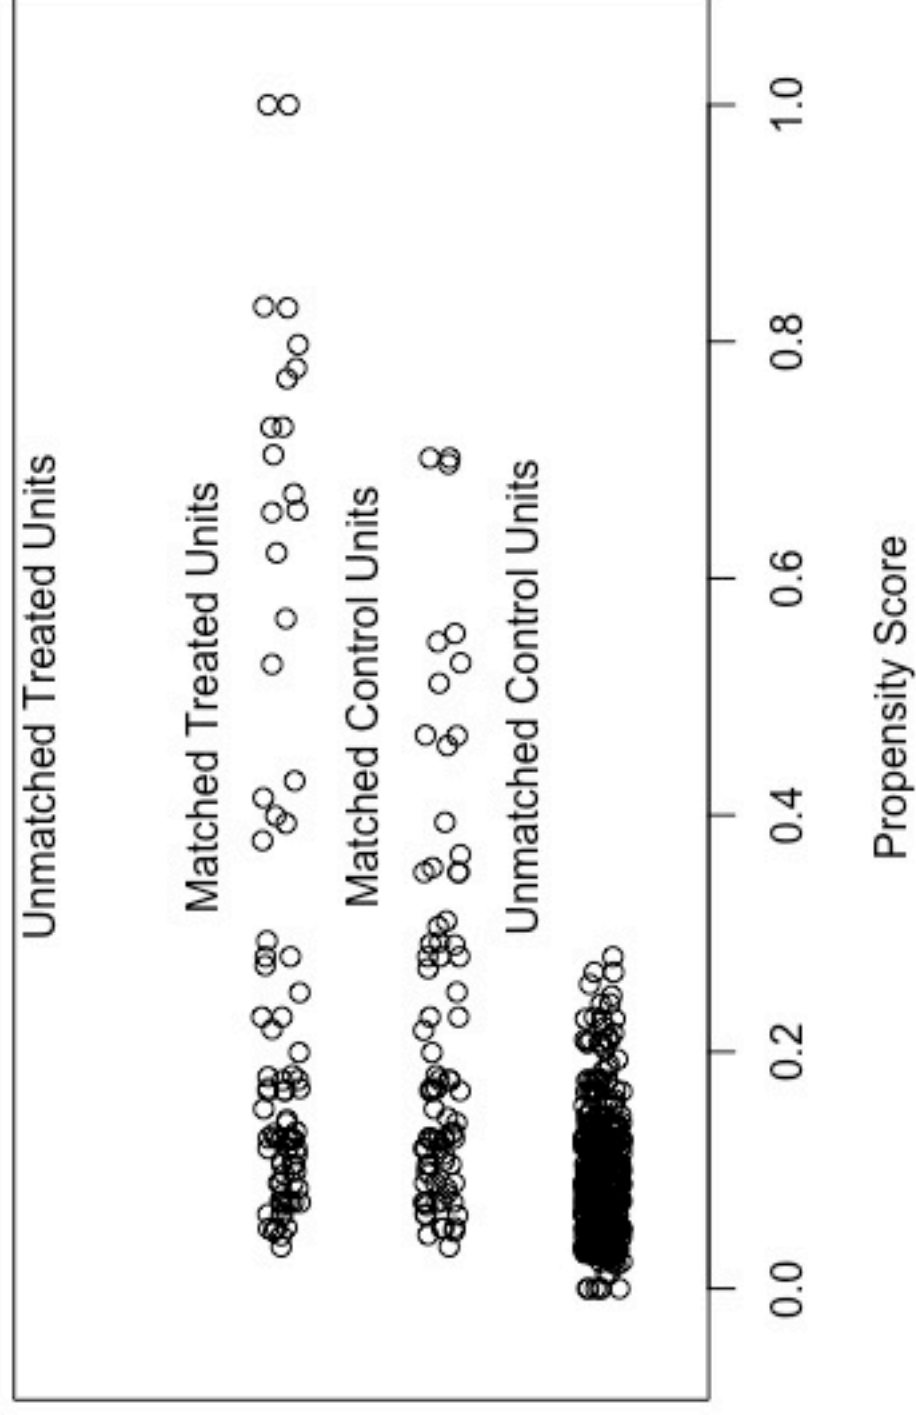

Supplement: s1 [file s1]

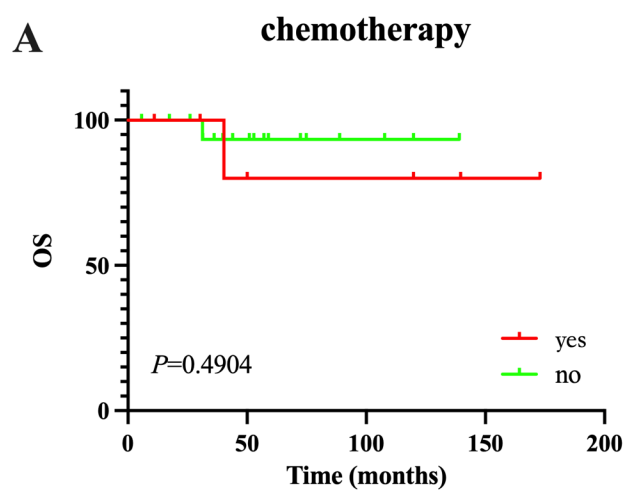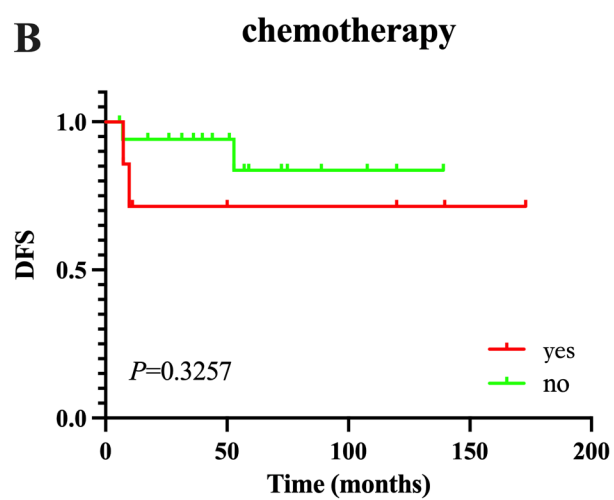

Supplement: s1 [file s1]
